# Supplementary material for: Cellular Sources and Regional Variations in the Expression of the Neuroinflammatory Marker Translocator Protein (TSPO) in the Normal Brain
Source: MDPI journal article supplement (doi:10.3390/ijms19092707), 2018-09-11
Supplement: s1 [file s1]

## Supplementary Information

# Cellular sources and regional variations in the expression of the neuroinflammatory marker Translocator Protein 18 kDa (TSPO) in the normal brain

Calina Betlazar <sup>1,2</sup>, Meredith Harrison Brown <sup>1,2</sup>, Ryan J. Middleton <sup>1</sup>, Richard Banati <sup>1,2</sup> and Guo-Jun Liu <sup>1,2, \*</sup>

<sup>1</sup> Australian Nuclear Science and Technology Organisation, New Illawarra Road, Lucas Heights, NSW 2234, Australia

<sup>2</sup> Discipline of Medical Imaging & Radiation Sciences, Faculty of Medicine and Health, Brain and Mind Centre, University of Sydney, 94 Mallett Street, Camperdown, NSW 2050, Australia

\* Correspondence: calinab@ansto.gov.au; gdl@ansto.gov.au; rib@ansto.gov.au

### Supplementary Materials and Methods

**Supplementary Table S1.** Primary antibodies used for immunohistochemistry/fluorescence staining in this study. Specificity of the TSPO antibody has been validated in a global TSPO knockout mouse model [1]. Note that GFAP was used to detect mature astrocytes as well as neural stem/progenitors in neurogenic regions.

| Target        | Description       | Dilution | Supplier      | ID #     |
|---------------|-------------------|----------|---------------|----------|
| TSPO          | Rabbit monoclonal | 1:400    | Abcam         | ab109497 |
| CD11b         | Rat monoclonal    | 1:200    | Bio-Rad       | MCA711   |
| CD31          | Rat monoclonal    | 1:400    | Bio-Rad       | MCA2388T |
| Nestin        | Rat monoclonal    | 1:200    | Abcam         | ab81462  |
| PDGFR $\beta$ | Rat monoclonal    | 1:50     | Abcam         | ab91066  |
| GFAP          | Rat monoclonal    | 1:200    | Thermo Fisher | 13-0300  |
| Calbindin     | Mouse monoclonal  | 1:100    | Abcam         | ab82812  |
| NeuN          | Mouse monoclonal  | 1:100    | Merck         | MAB377   |
| MBP           | Rat monoclonal    | 1:100    | Abcam         | ab7349   |

## Supplementary Results

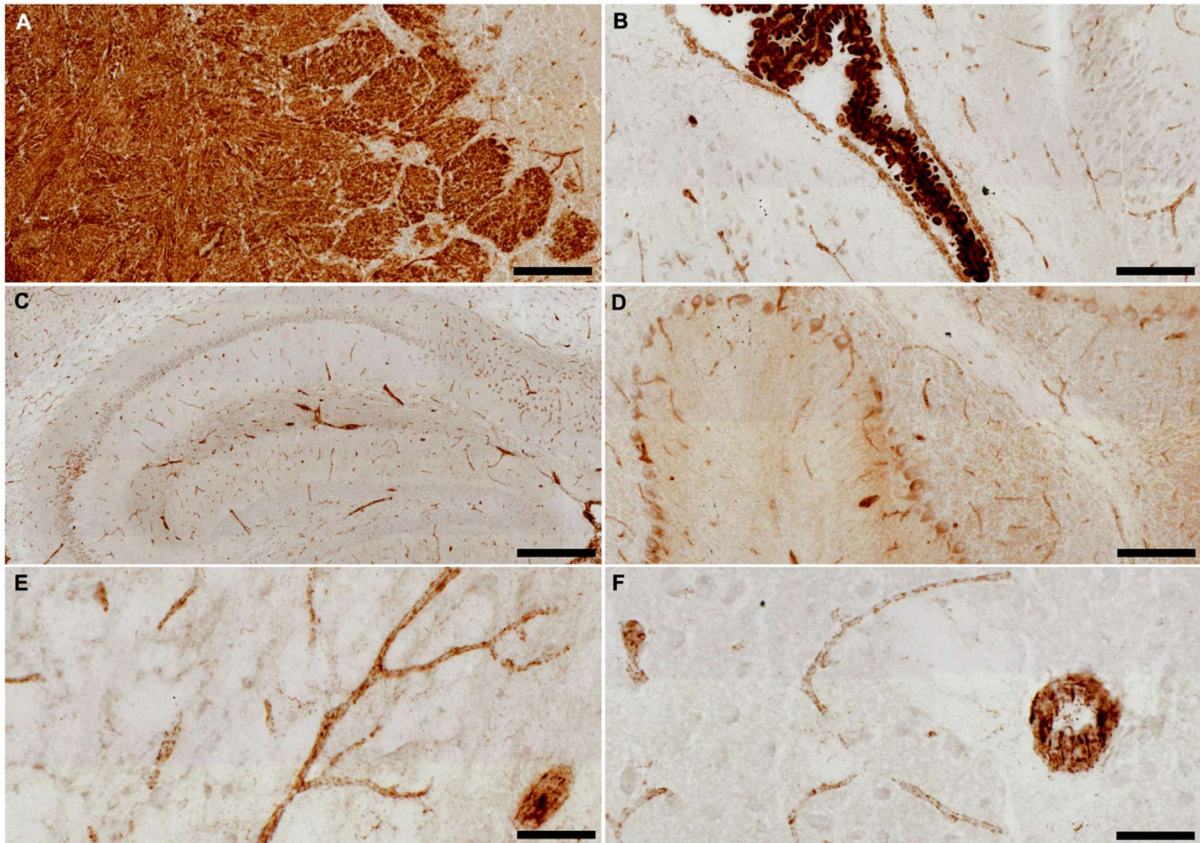

**Supplementary Figure S1.** TSPO distribution visualised with DAB immunohistochemistry using a validated TSPO antibody (#ab109497, Abcam). (A) Nerve trunks in the olfactory bulb; (B) Choroid plexus; (C) Hippocampus; (D) Purkinje neurons in cerebellum; (E) small blood vessels and capillaries; (F) artery and capillaries. Scale bars = 100 $\mu$ m for A, B, C and D; scale bars = 40 $\mu$ m for E and F.

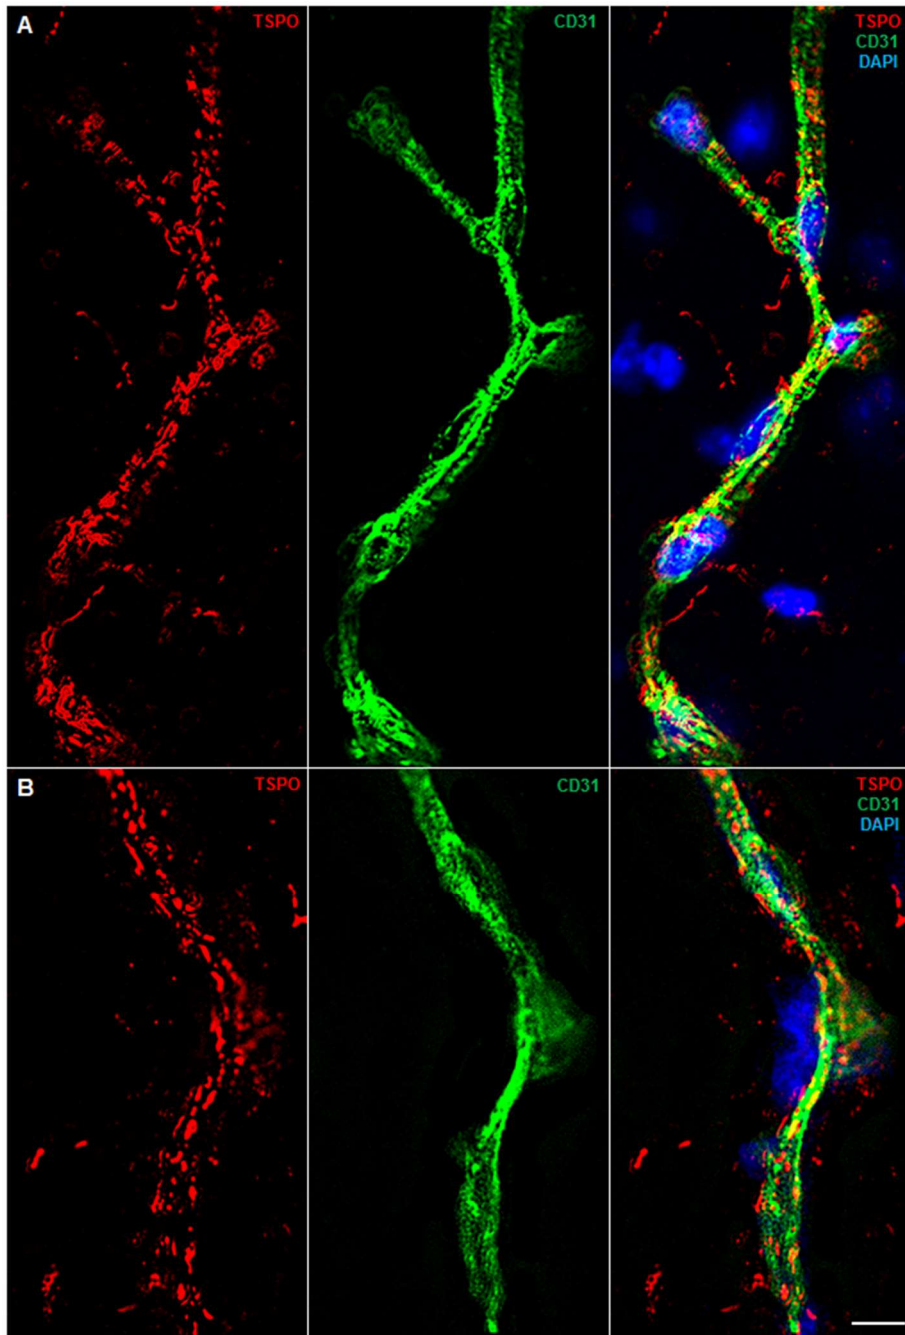

**Supplementary Figure S2.** TSPO strongly localises in vascular endothelial cells of the brain. (A, B) CD31+ blood vessels across all brain regions ubiquitously express TSPO. Note the punctate staining pattern of TSPO, indicative of mitochondrial localisation. Scale bar = 20 $\mu$ m.



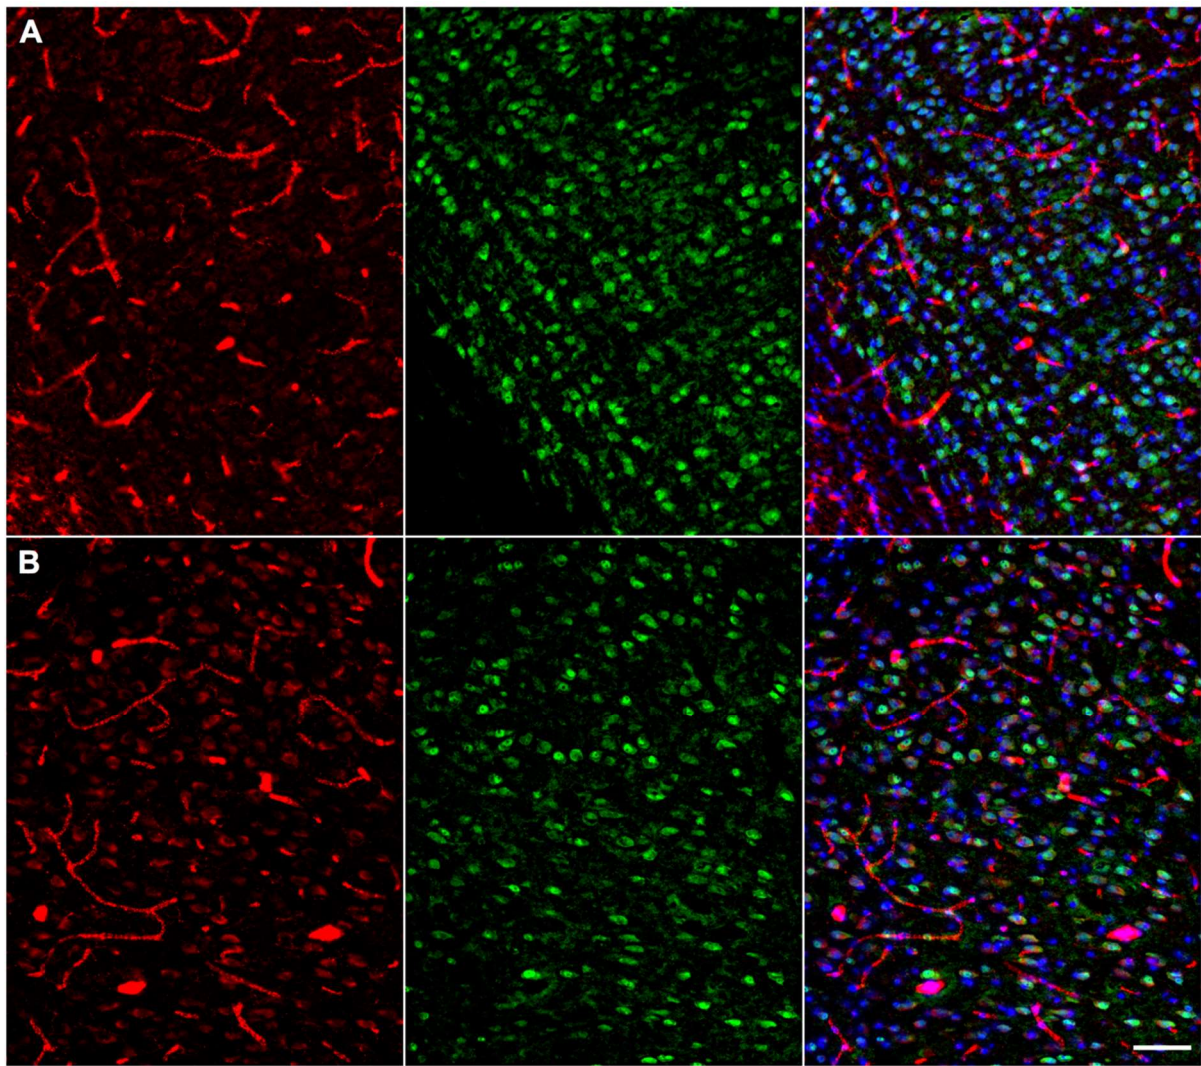

**Supplementary Figure S3.** Mature neuronal populations do not express TSPO. NeuN+ neurons of the cerebral cortex (**A**) and thalamus (**B**) are not TSPO positive. Scale bar = 20 $\mu$ m.

#### Supplementary References

1. Banati RB, Middleton RJ, Chan R, Hatty CR, Kam WW, Quin C, et al. Positron emission tomography and functional characterization of a complete PBR/TSPO knockout. *Nat Commun.* 2014;5:5452.
